# Supplementary material for: Reduction of class I histone deacetylases ameliorates ER‐mitochondria cross‐talk in Alzheimer's disease
Source: PubMed Central journal article supplement (PMC10410063; doi:10.1111/acel.13895), 2023-06-26

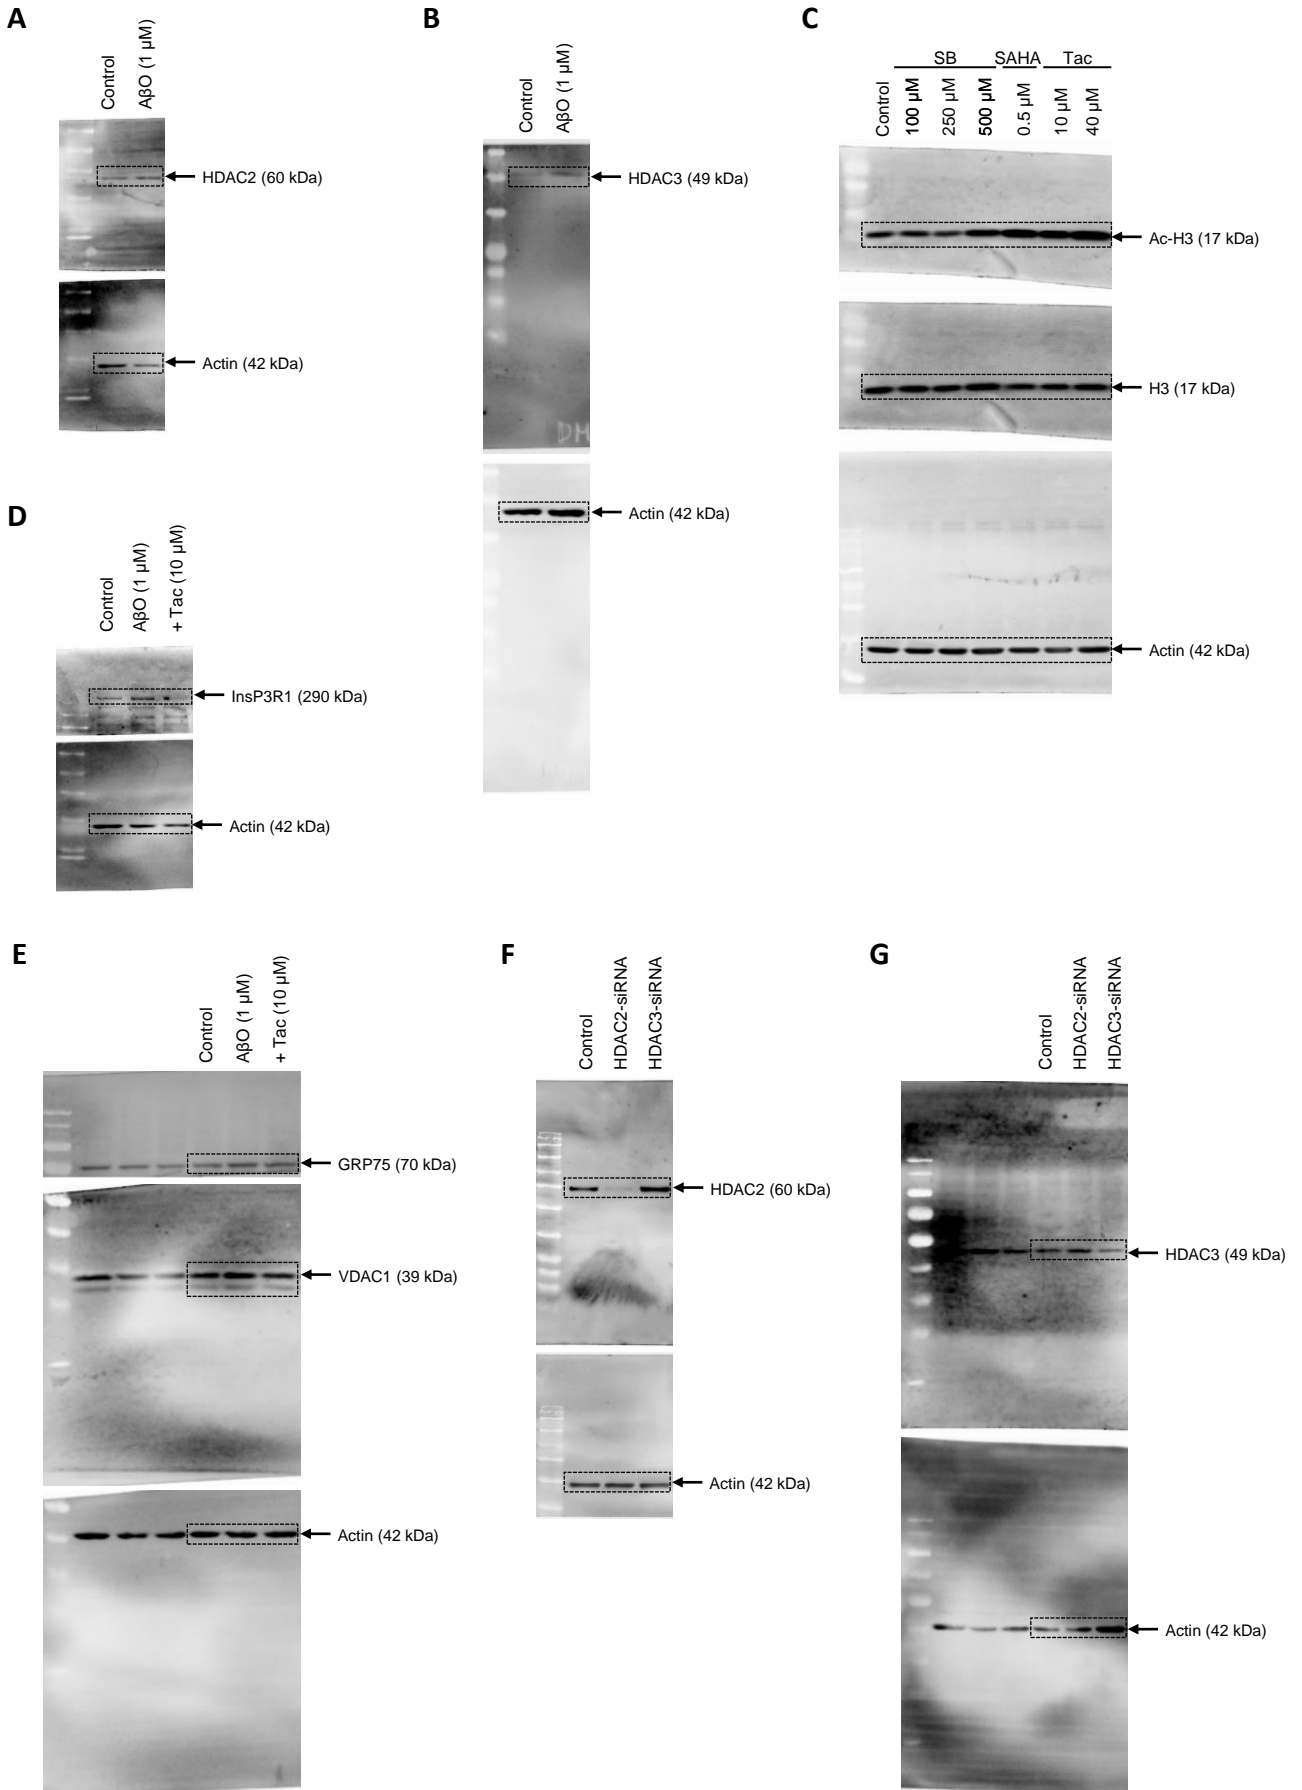

Supplement: ACEL-22-e13895-s003.pdf [file ACEL-22-e13895-s003.pdf]
